# Supplementary material for: Exploring the outcomes of non-surgical periodontal therapy in modulating periodontal parameters, renal function, and inflammatory biomarkers in chronic kidney disease patients with periodontitis
Source: PeerJ. 2025 May 29;13:e19492. doi: 10.7717/peerj.19492 (PMC12126971; doi:10.7717/peerj.19492)
Supplement: Supplemental Information 3 [file peerj-13-19492-s003.xlsx]

## Sheet: Age
CKD-P	P	HP
68	42	34
57	44	40
42	45	33
53	44	30
68	45	45
51	50	26
30	61	24
59	61	27
65	54	41
36	61	24
59	45	29
57	63	29
43	52	28
41	53	36
57	54	52
69	42	33
62	62	21
41	45	32
63	41	34
66	63	29

## Sheet: PPD
CKD-P	P
6.2	5.7
4	5.5
4	5.63
5.68	5.13
5.84	5.16
4.53	5.4
5.256	6.25
4.36	5.11
5.92	4.792
5.109	3.386
6.34	4.501
4.35	4.6
6	6
4.619	3.859
5.83	4.44
6.09	5.11
6.344	5.018
4.38	4.986
6.177	4.552
5.05	5.16

## Sheet: CAL
CKD-P	P
5.2	4.92
3.68	3
5.05	5.3
4.57	2.33
5.45	6.17
4.52	2.1
4.82	0
4.57	0
5	4.5
4.83	4.36
5	5.45
3.1	4.77
5.65	4.9
4.83	0
5.54	4.29
5	3.3
3.78	4.44
3.88	6.05
4.71	5
5.01	6.17

## Sheet: GBI
CKD-P	P	HP
42.71	42.59	34.5
20.8	11.45	56.3
39.87	10.71	29.5
86	25	33.6
26.7	70.04	100
86	52.4	23.5
39	20.64	56.1
34	76	33.29
70	30	22.7
86	62.4	27.68
48	23.91	0
14.77	77.1	44.17
39	32.5	70.83
79	31.23	50
36	73.88	44.28
48	43.2	6.21
55.36	57.5	54.17
35	50	34.5
79	42.3	12.68
57	67.24	42

## Sheet: PS
CKD-P	P	HP
37.5	73.15	1
98.96	68.75	3.2
87.6	80.96	0.89
85.8	36.67	5.6
69.2	31.71	5.65
86	27.4	15.2
68	40.63	2.3
76	17.7	14.5
65	54.9011	1.56
86	32.1	2.68
56	38.63	0
80.68	67	0
67	57.6	9.38
76	5.43	15.52
36	90	8.6
56	56.4	29.03
64.5	100	0.83
75	91	1.265
44	76.92	10.58
85.8	39.68	12.2

## Sheet: CKD-P PPD PRE VS POST
Pre-NSPT	Post-NSPT
6.2	1.52
4	2.8
4	1.6
5.68	2.3
5.84	4.18
4.53	2.91
5.256	3.18
4.36	2.42
5.92	5.21
5.109	2.3
6.34	2.91
4.35	2.976
6	2.89
4.619	2.3
5.83	3.92
6.09	3.09
6.344	3.25
4.38	2.18
6.177	1.75
5.05	3.2

## Sheet: CKD-P CAL PRE VS POST
Pre-NSPT	Post-NSPT
5.2	3.2
3.68	3.52
5.05	3.8
4.57	2.42
5.45	2.741
4.52	1.25
4.82	4.2
4.57	3.92
5	5.32
4.83	2.85
5	2.9
3.1	1.25
5.65	3.87
4.83	3.65
5.54	3.09
5	3.09
3.78	2.55
3.88	3.2
4.71	3.91
5.01	3.03

## Sheet: CKD-P GBI PRE VS POST
Pre-NSPT	Post-NSPT
42.71	32
20.8	11.45
39.87	10.71
86	21.7
26.7	7
86	18
39	4.3
34	25
70	25
86	18.75
48	15
14.77	9.25
39	15
79	22
36	18.9
48	13.52
55.36	32
35	13
79	24
57	12

## Sheet: CKD-P PS PRE VS POST
Pre-NSPT	Post-NSPT
37.5	20.6
98.96	47
87.6	40
85.8	12.5
69.2	23
86	27
68	16
76	29
65	16
86	15.64
56	15.64
80.68	17.56
67	10.86
76	16
36	18.1
56	36
64.5	29.7
75	36
44	20.12
85.8	11.11

## Sheet: P PPD PRE VS POST
Pre-NSPT	Post-NSPT
5.7	2.12
5.5	2.7
5.63	1.66
5.13	2.15
5.16	2.9
5.4	2.14
6.25	2.8
5.11	2
4.792	1.643
3.386	1.58
4.501	1.22
4.6	4
6	2.5
3.859	2.14
4.44	3.5
5.11	0.742
5.018	2.42
4.986	2.5
4.552	2.25
5.16	2.15

[truncated: 16 more sheets: P CAL PRE VS POST, P GBI PRE VS POST, P PS PRE VS POST, SODIUM, UREA, POTASSIUM, CALCIUM, CREATININE, eGFR, IL-6, TGF-B1, CKD-P IL-6, P IL-6, CKD-P TGF-B1, P TGF-B1, MLR ROUND 2]
